# Supplementary figures and images for: An active form of Vav1 induces migration of mammary epithelial cells by stimulating secretion of an epidermal growth factor receptor ligand
Source: Springer Nature journal article supplement (doi:10.1186/1478-811x-4-5), 2006-05-18

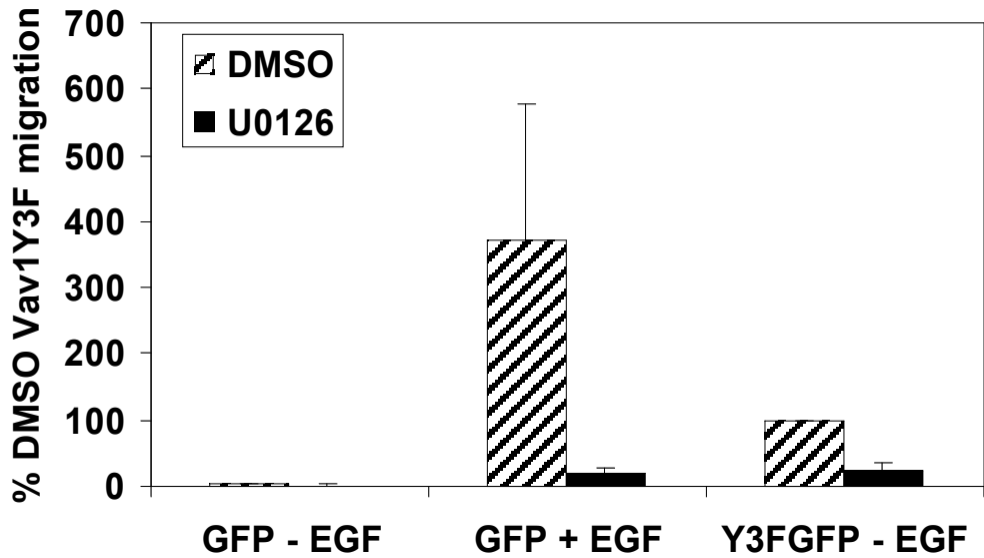

Supplement: Additional file 1 [file 1478-811x-4-5-s1.pdf]
